# Supplementary material
Source: PubMed Central journal article supplement (PMC8171584)
Supplement: NIHMS1698333-supplement-Supple_Figure_S1.pdf [file NIHMS1698333-supplement-Supple_Figure_S1.pdf]

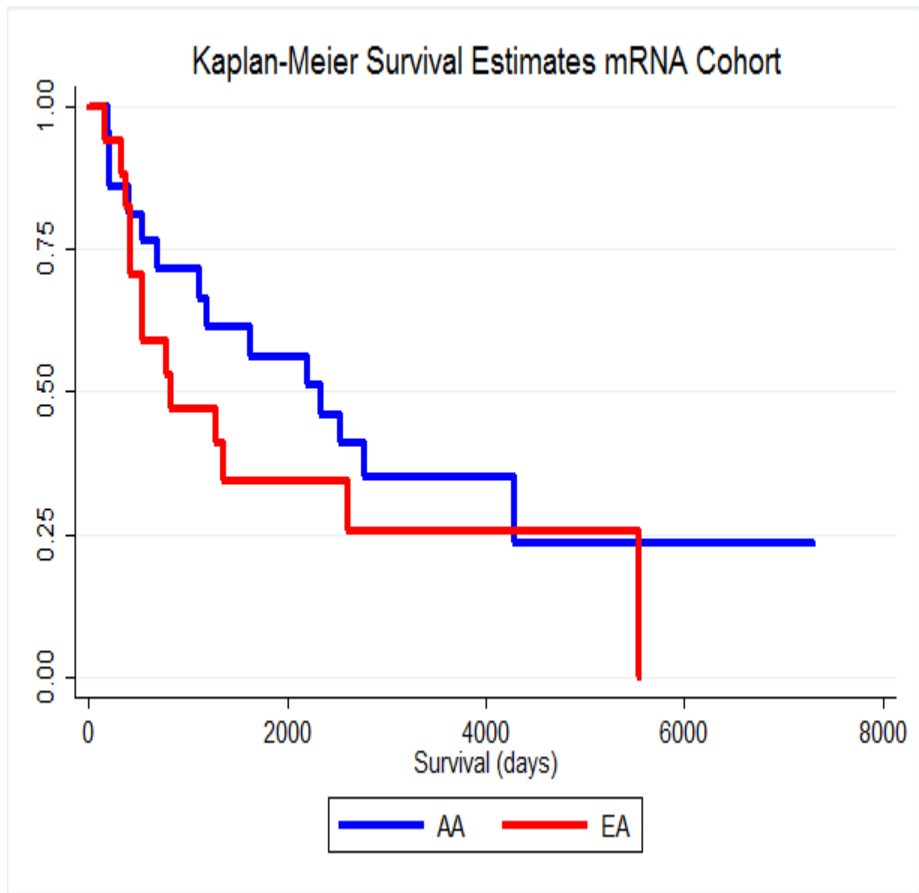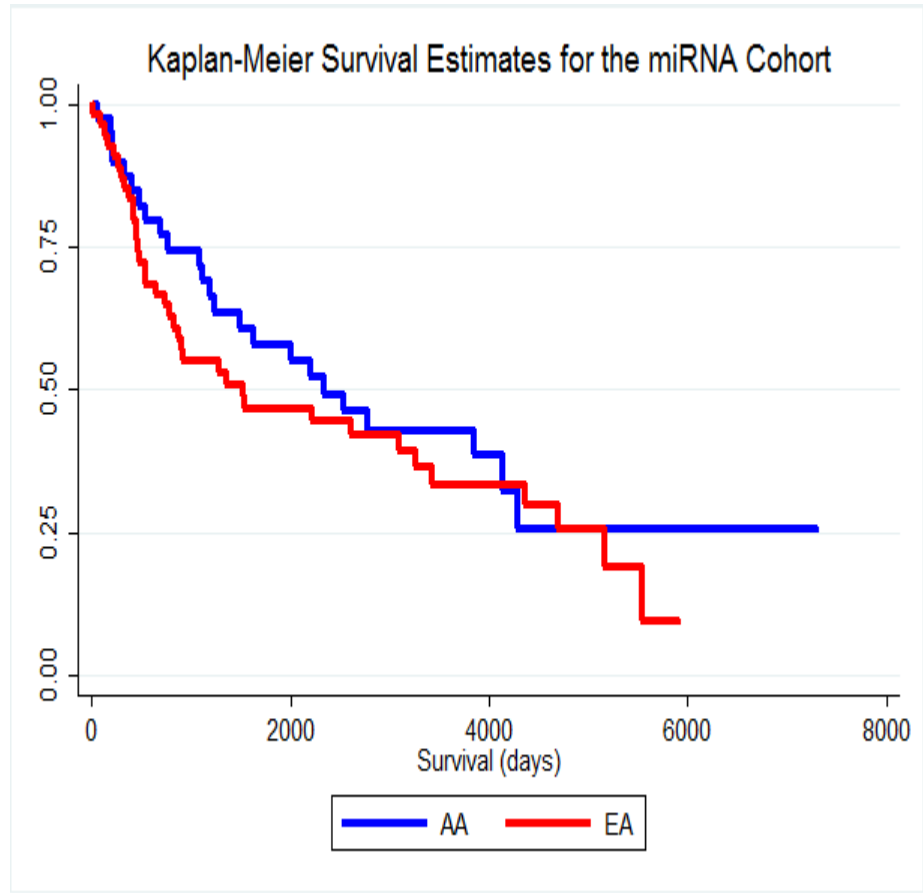

**Supplementary Figure 1. Lung cancer-specific survival analysis.** Kaplan-Meier Survival estimates for both AAs and EAs in the mRNA and miRNA cohorts.
