# Supplementary material
Source: PubMed Central journal article supplement (PMC8171584)
Supplement: NIHMS1698333-supplement-Supple_Figure_S3.pdf [file NIHMS1698333-supplement-Supple_Figure_S3.pdf]

**A**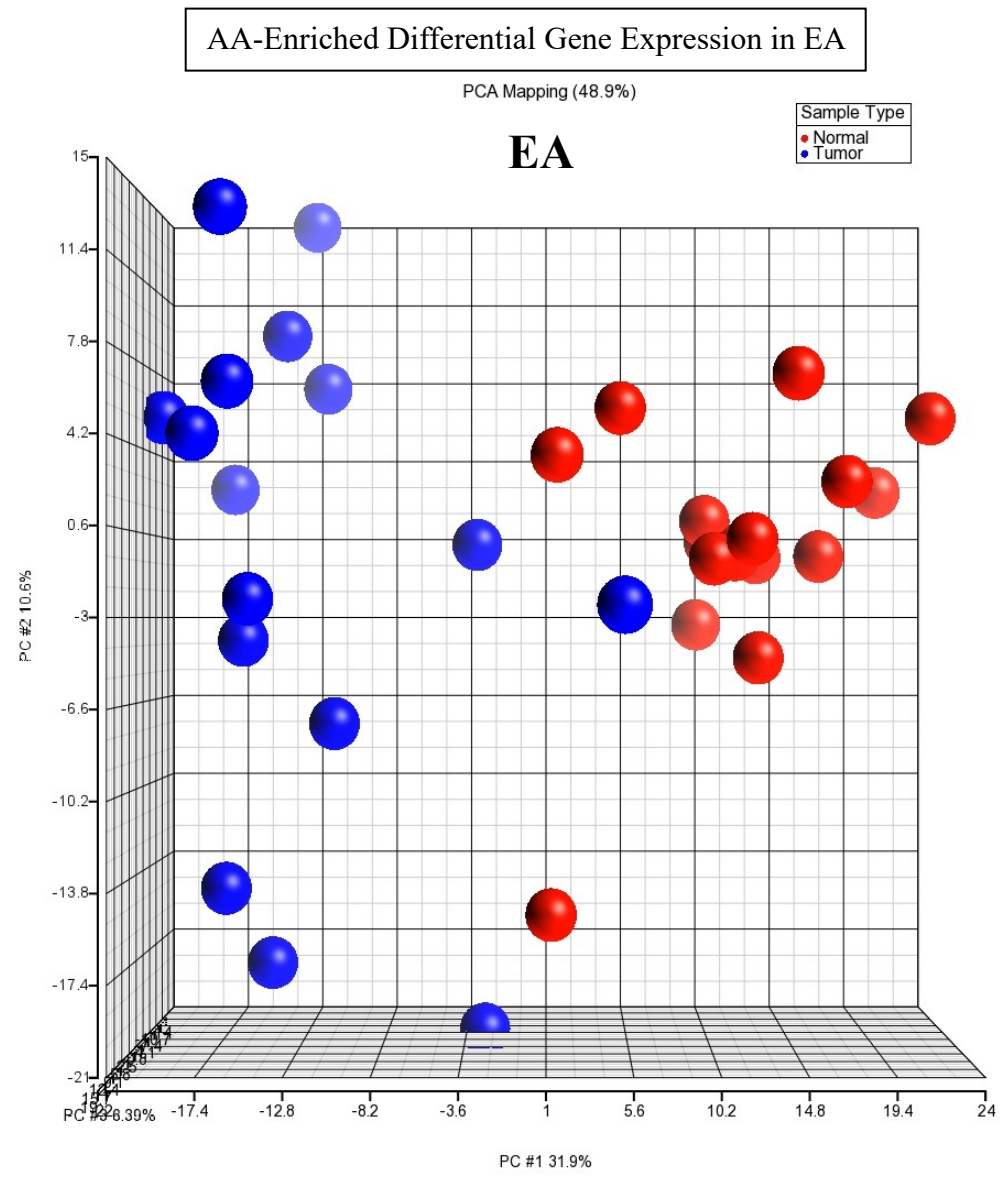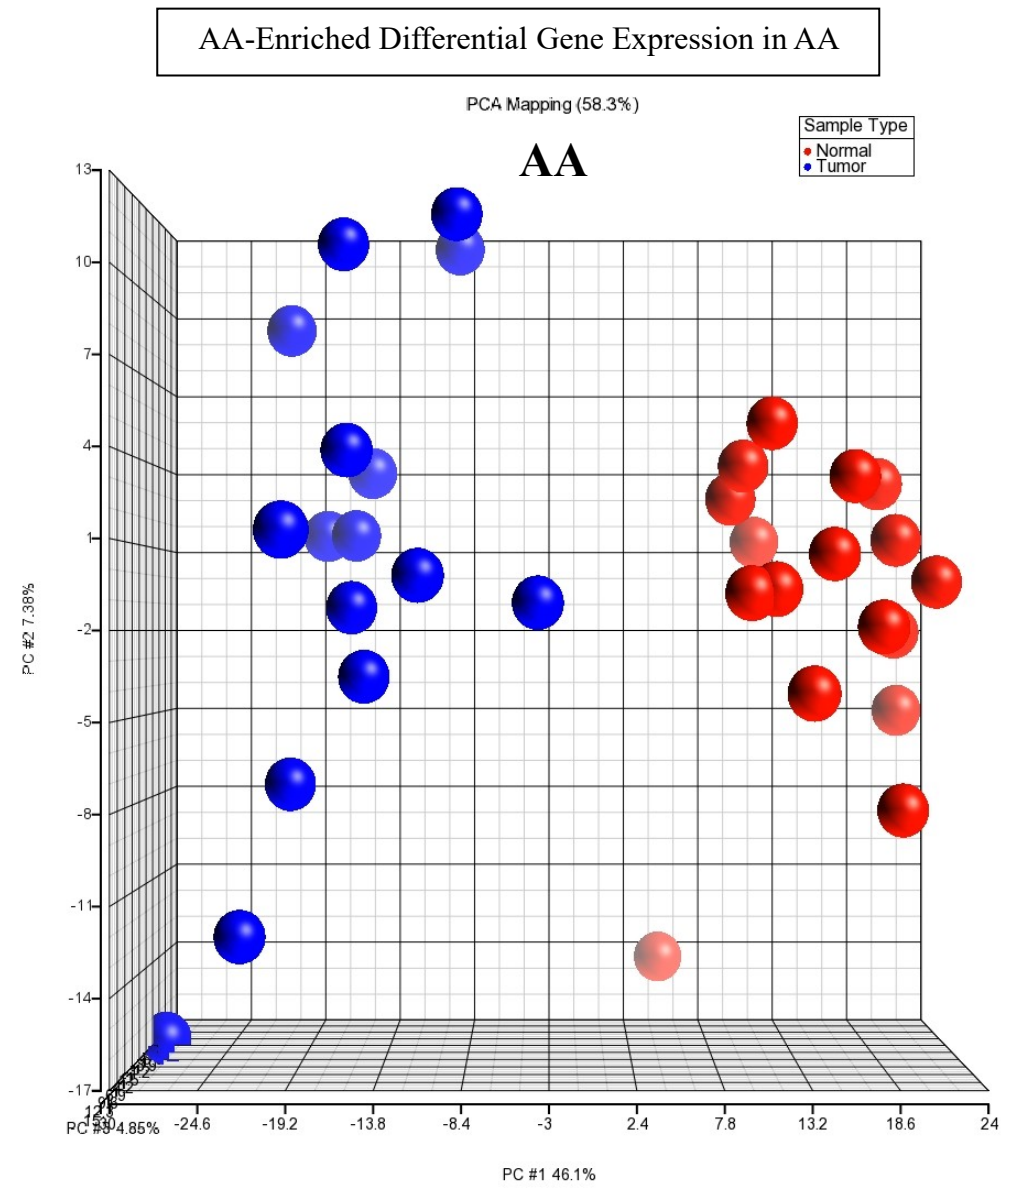

**Supplementary Figure 3. Comparative analysis of AA-enriched and EA-enriched differential gene expression signatures.** Unsupervised principal component analysis of (A) AA-enriched differentially expressed genes and (B) EA-enriched differentially expressed genes from lung tumors compared with adjacent normal lung tissues in AAs and EAs.

**B**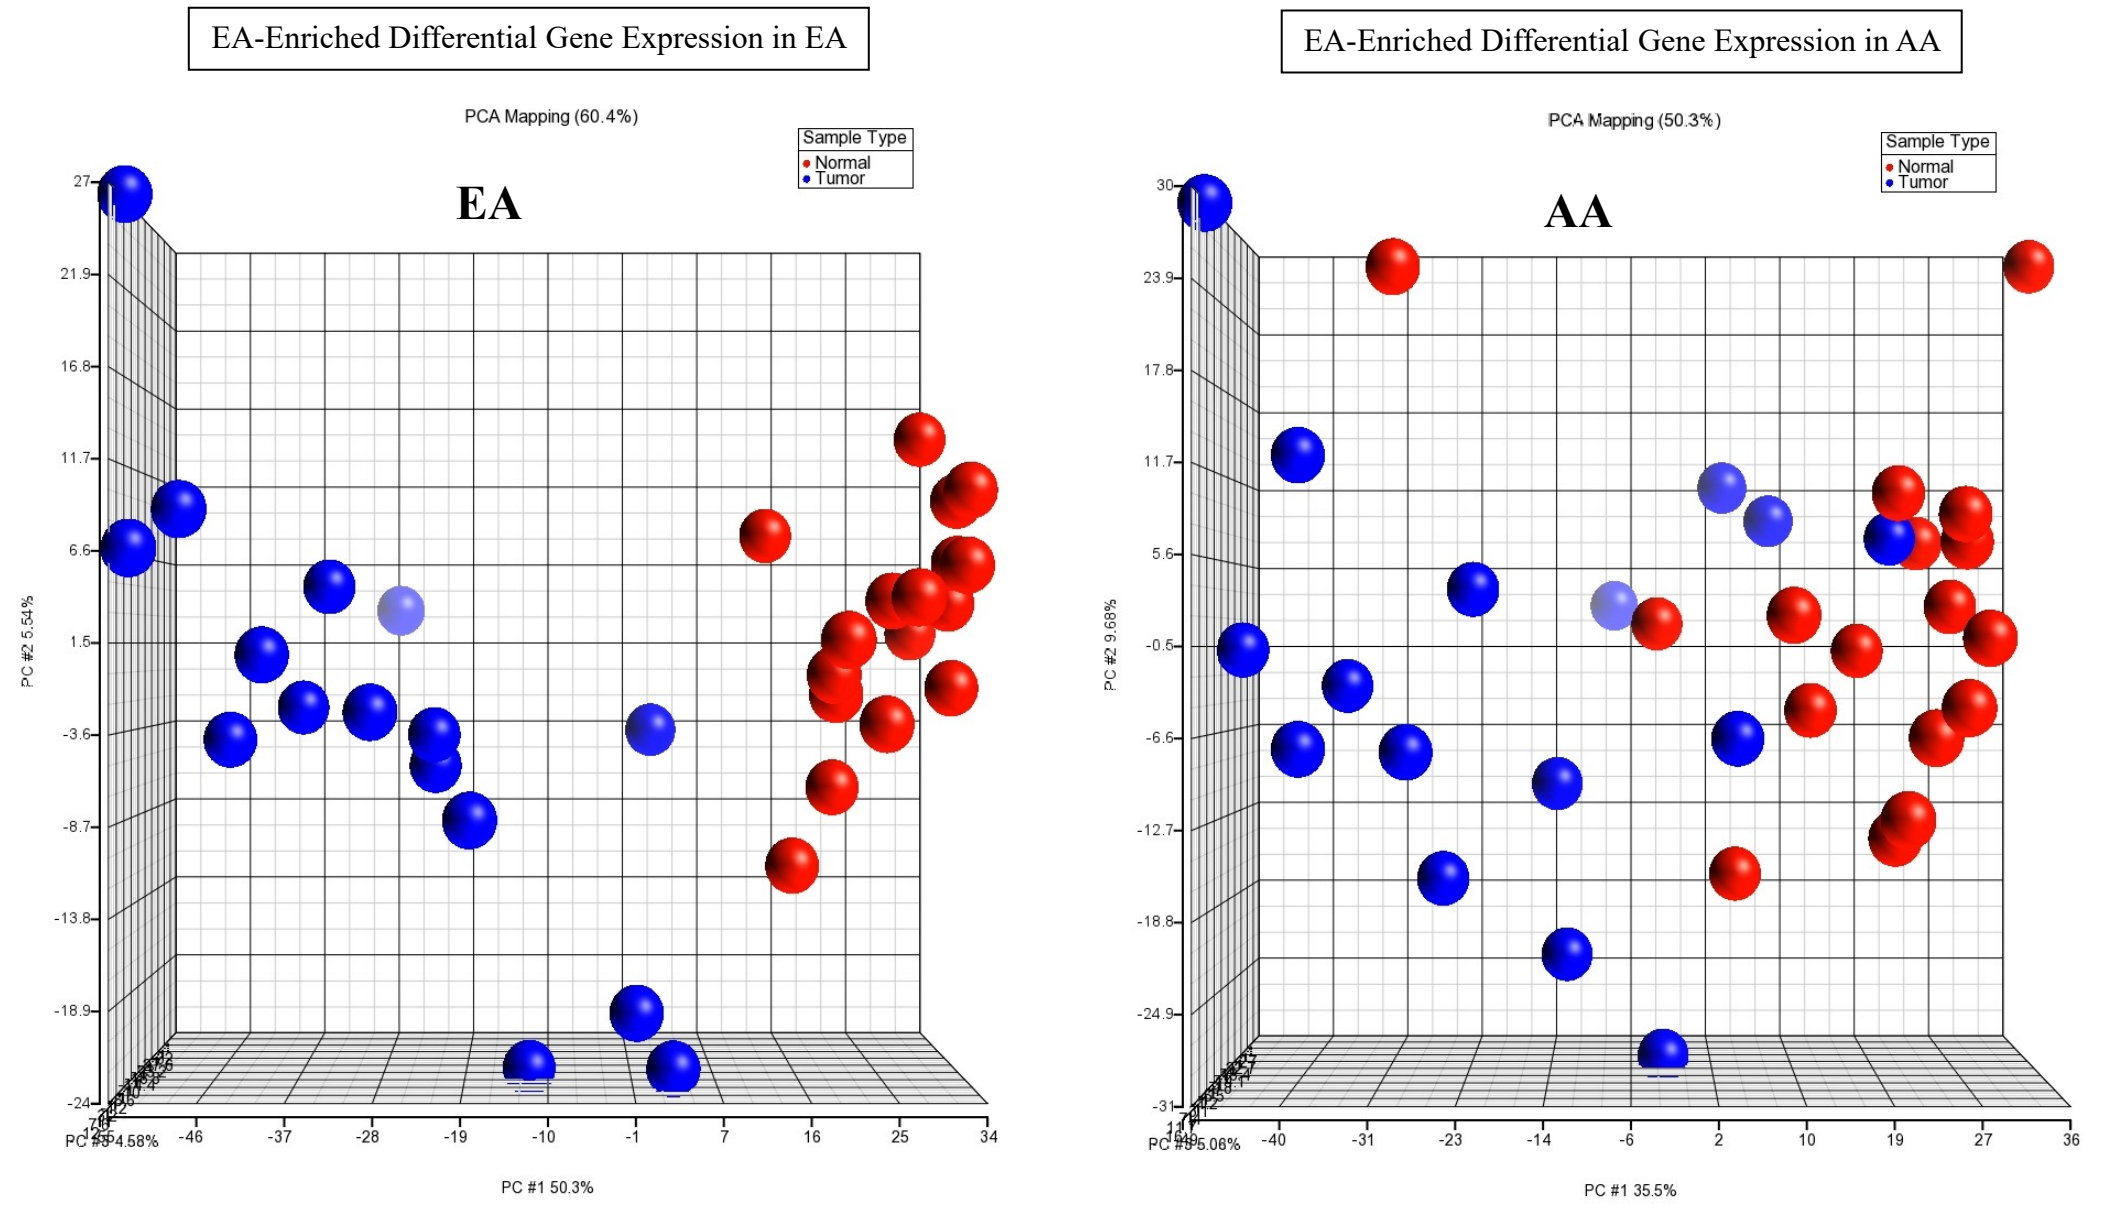

**Supplementary Figure 3. Comparative analysis of AA-enriched and EA-enriched differential gene expression signatures.** Unsupervised principal component analysis of (A) AA-enriched differentially expressed genes and (B) EA-enriched differentially expressed genes from lung tumors compared with adjacent normal lung tissues in AAs and EAs.
