# Supplementary material
Source: PubMed Central journal article supplement (PMC8171584)
Supplement: NIHMS1698333-supplement-Supple_Figure_S4.pdf [file NIHMS1698333-supplement-Supple_Figure_S4.pdf]

C2 Unique Pathways  
AA Enriched EA Enriched

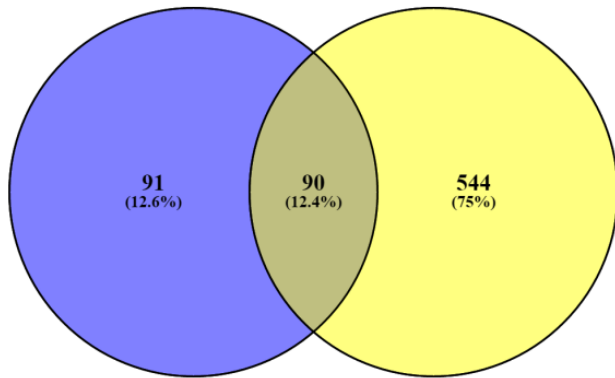

C5 Unique Pathways  
AA Enriched EA Enriched

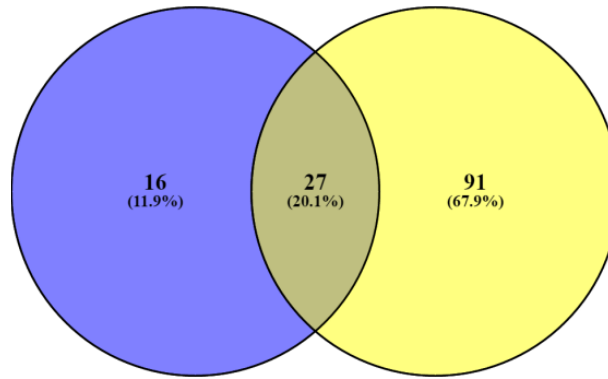

C6 Unique Pathways  
AA Enriched EA Enriched

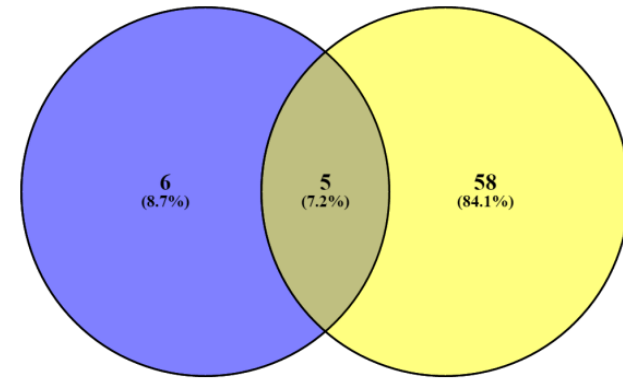

**Supplementary Figure 4. Comparison of Molecular Signature Database pathway enrichment in lung cancers from AAs and EAs.** Comparison of C2, C5, and C5 pathway enrichment in lung tumors based on AA and EA specific gene expression signatures.
