# Supplementary material
Source: PubMed Central journal article supplement (PMC8171584)
Supplement: NIHMS1698333-supplement-Supple_Figure_S5.pdf [file NIHMS1698333-supplement-Supple_Figure_S5.pdf]

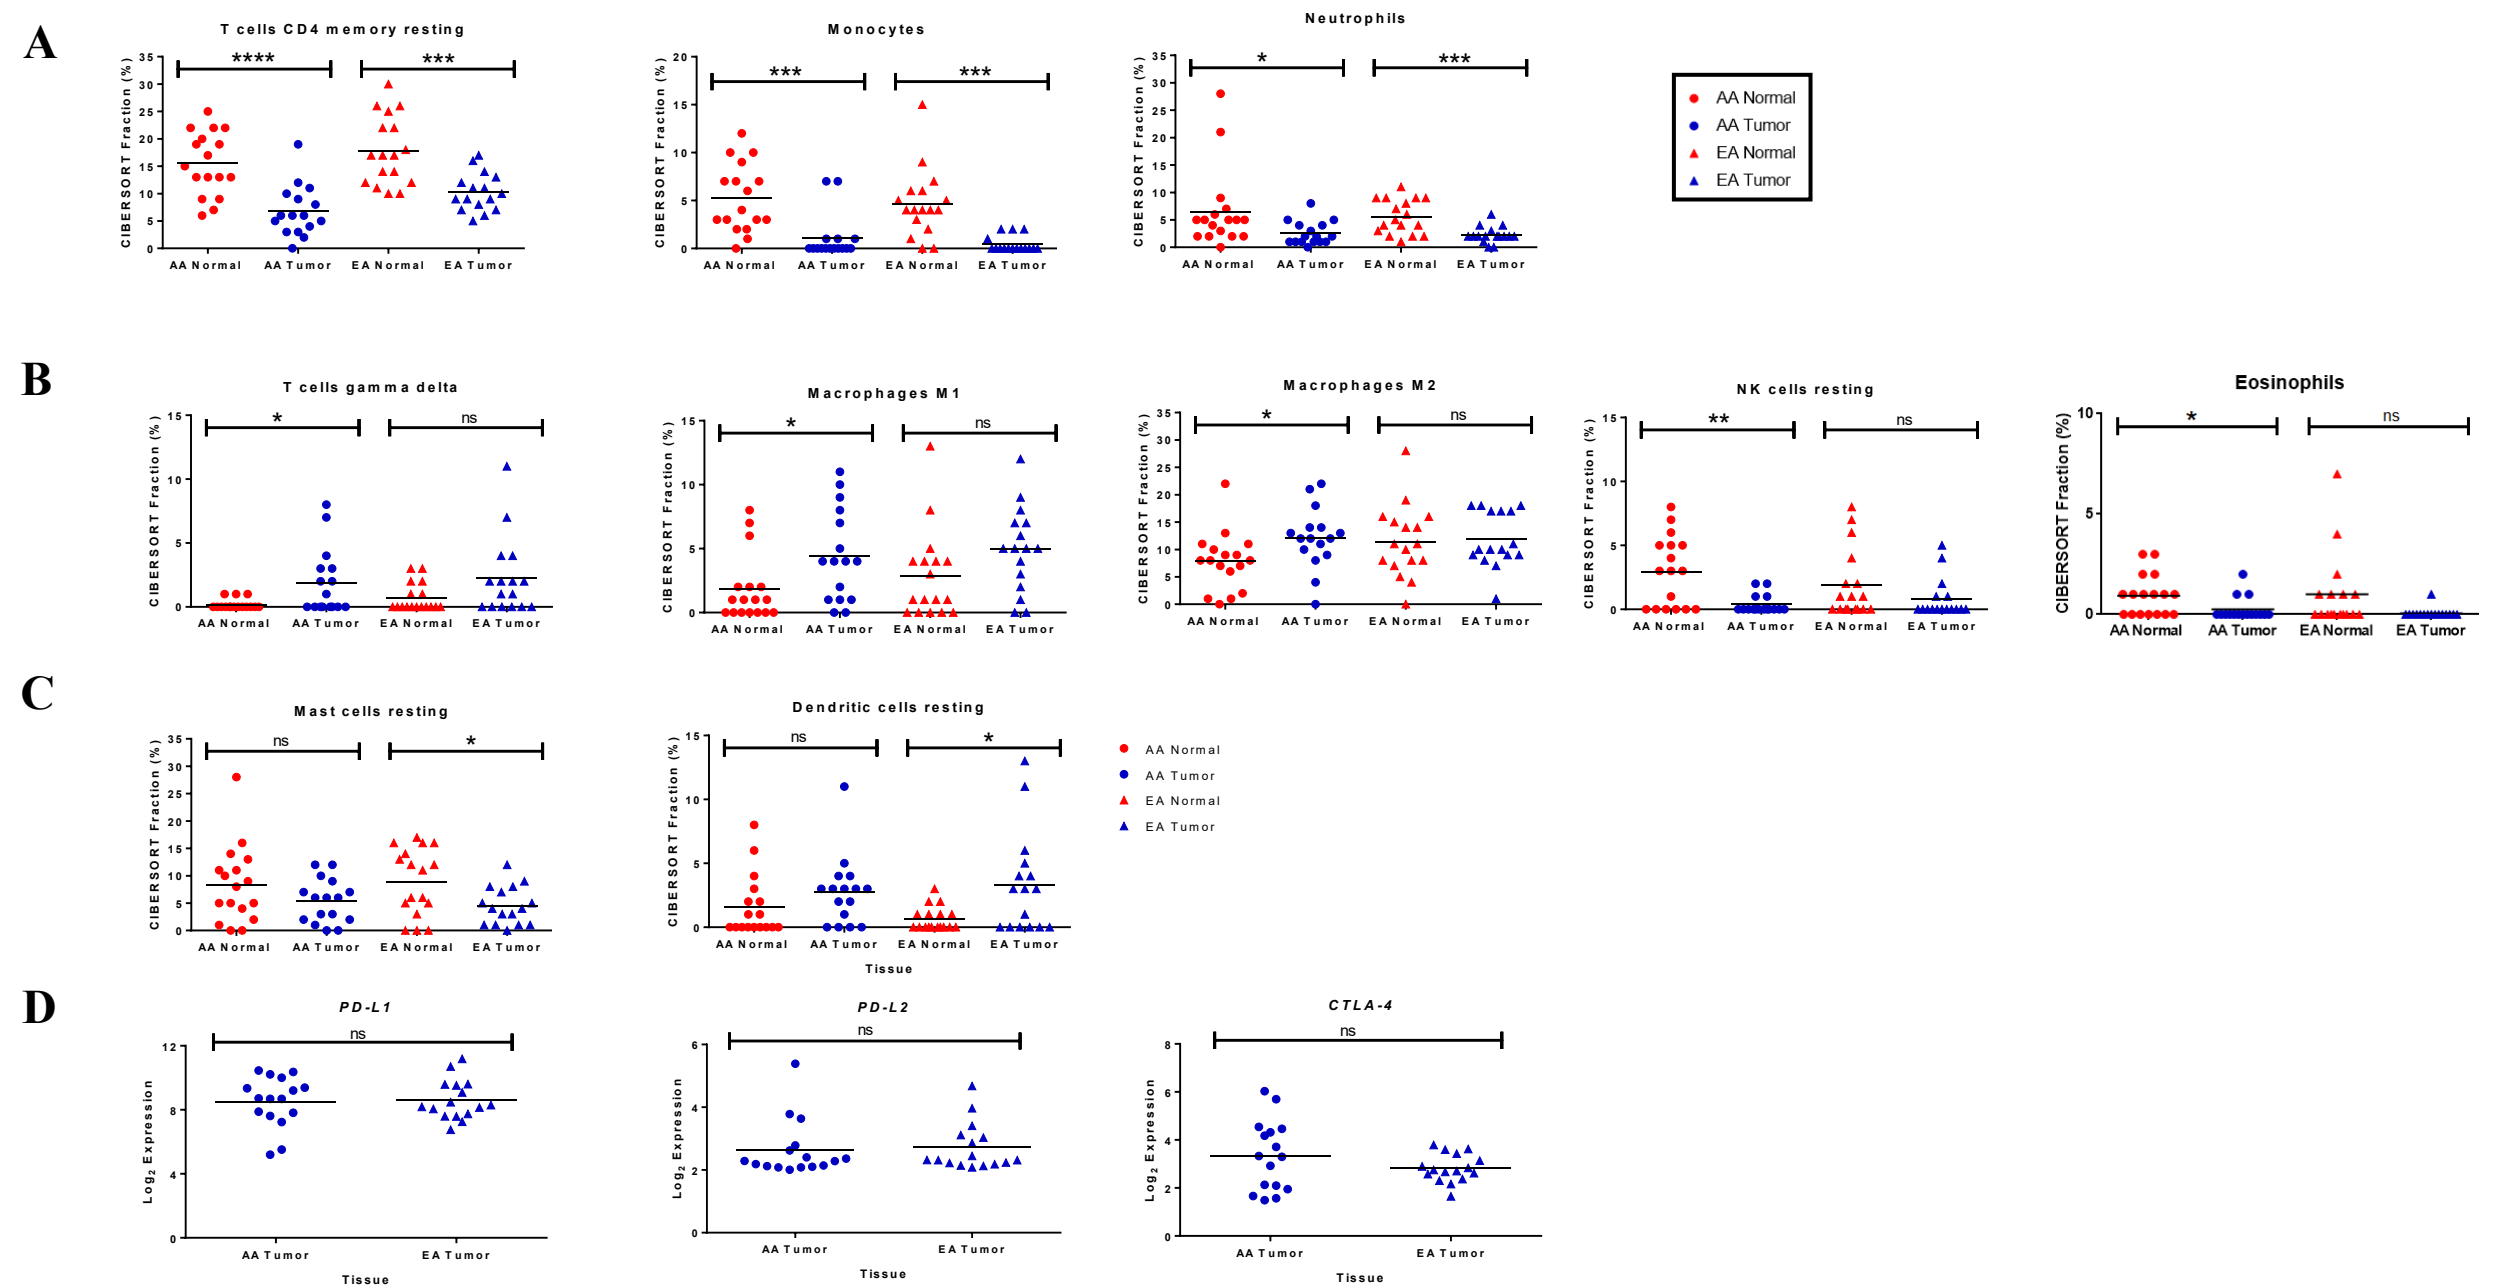

**Supplementary Figure 5. Human leukocyte composition of lung cancer evaluated by CIBERSORT based on gene expression.** A) Differences in specific leukocyte cell subsets in normal and lung tumor tissues. B) Population-specific differences in specific leukocyte cell subsets in normal and lung tumor tissues from AAs. C) Population-specific differences in specific leukocyte cell subsets in normal and lung tumor tissues from EAs. D) Differences in *PD-L1*, *PD-L2*, and *CTLA-4* expression in lung tumors from AAs and EAs.
