# Supplementary material
Source: PubMed Central journal article supplement (PMC8171584)
Supplement: NIHMS1698333-supplement-Supple_Figure_S6.pdf [file NIHMS1698333-supplement-Supple_Figure_S6.pdf]

A

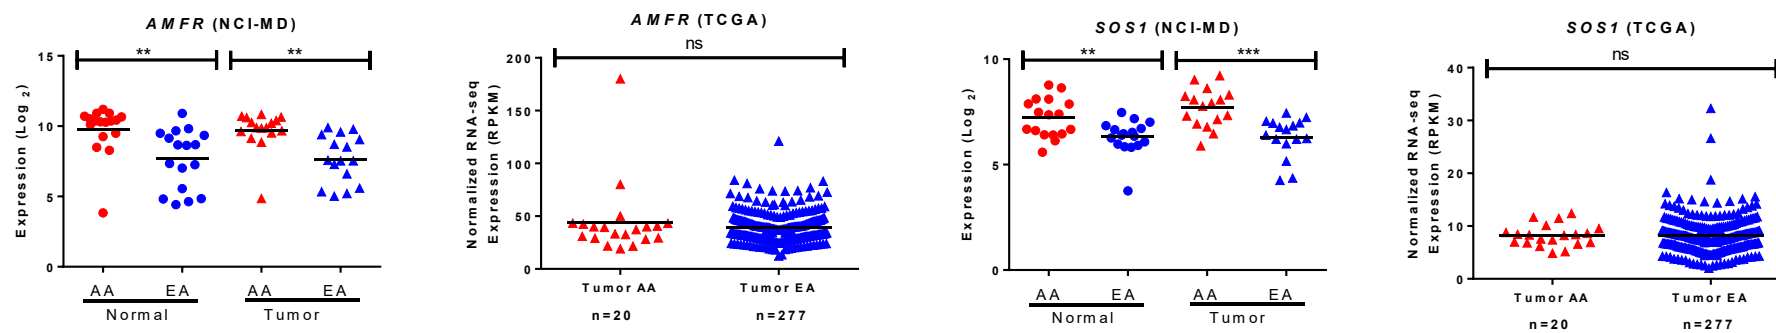

B

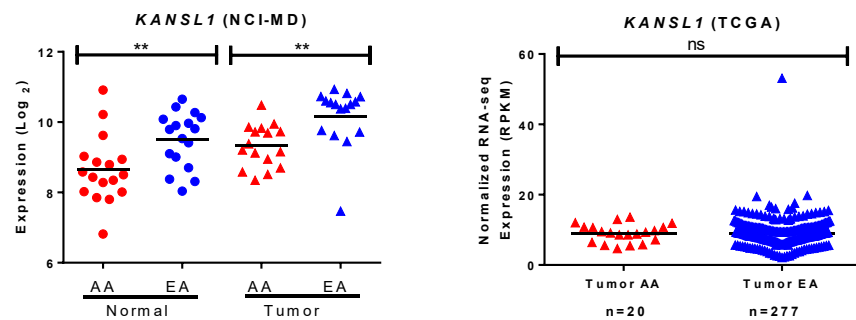

**Supplementary Figure 6. Transcriptomic evidence of population stratification in AAs.**

A) Expression of *AMFR* and *SOS1* in lung tissues from AAs and EAs. B) Expression of *KANSL1* in lung tissues from AAs and EAs.
