# Supplementary material
Source: PubMed Central journal article supplement (PMC8171584)
Supplement: NIHMS1698333-supplement-Supple_Figure_S7.pdf [file NIHMS1698333-supplement-Supple_Figure_S7.pdf]

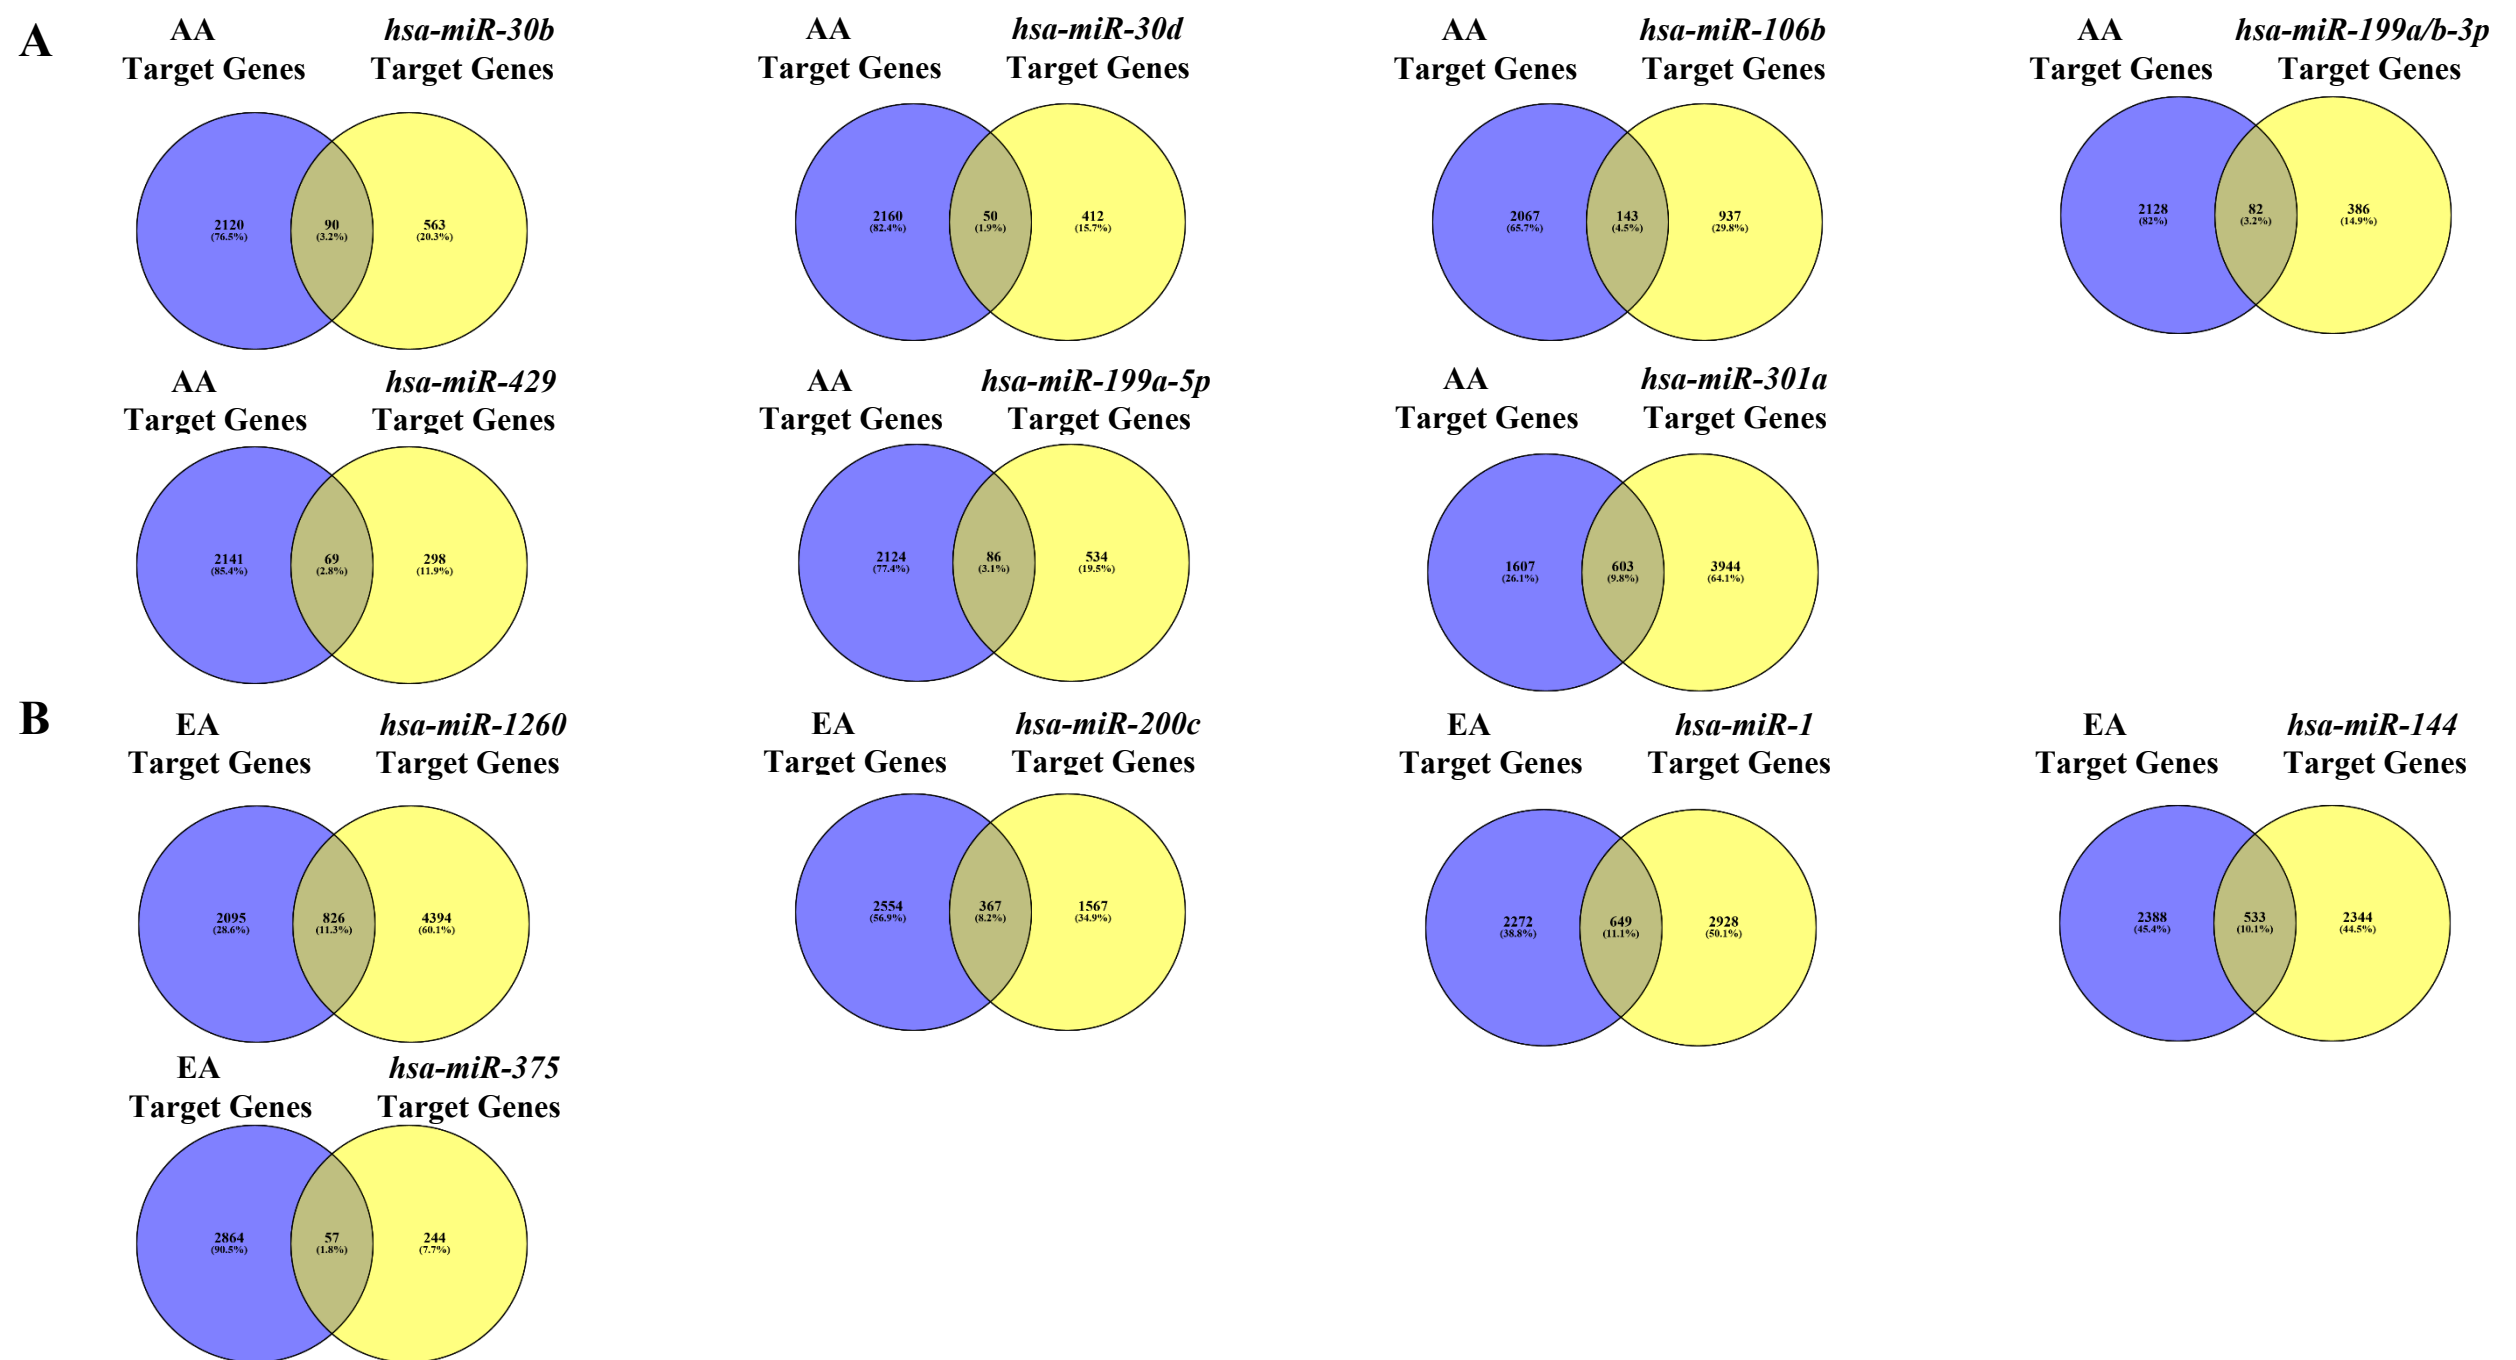

**Supplementary Figure 7. microRNA target gene enrichment in AA-specific and EA-specific gene signatures.** A) microRNA target gene enrichment in differentially expressed target genes from AAs (All hypergeometric  $P = < 0.001$ ). B) miR target gene enrichment in differentially expressed target genes from EAs (All hypergeometric  $P = < 0.001$ ).
